# **BioDecoder: A miRNA Bio-interpretable Neural Network Model for Noninvasive Diagnosis of Breast Cancer**

Lei Liu<sup>1, #</sup>, Weili Lin<sup>1, #</sup>, Suqi Cao<sup>2</sup>, Liu Yang<sup>2</sup>, Sheng Gao<sup>1</sup>, Na Jiao<sup>2</sup>, Lixin Zhu<sup>3</sup>, Ruixin Zhu<sup>1, \*</sup>,

Dingfeng Wu<sup>2, \*</sup>

1. Department of Gastroenterology, The Shanghai Tenth People's Hospital, School of Life Sciences and Technology, Tongji University, Shanghai 200072, P. R. China.

2. National Clinical Research Center for Child Health, the Children's Hospital, Zhejiang University School of Medicine, Hangzhou 310058, Zhejiang, P. R. China.

3. Department of Colorectal Surgery, Guangdong Institute of Gastroenterology, Guangdong Provincial Key Laboratory of Colorectal and Pelvic Floor Diseases, The Sixth Affiliated Hospital, Sun Yat-sen University, Guangzhou 510655, P. R. China.

<sup>#</sup>These authors contributed equally: Lei Liu, Suqi Cao, and Liu Yang.

<sup>\*</sup>Corresponding authors:

**Ruixin Zhu** ([rxzhu@tongji.edu.cn](mailto:rxzhu@tongji.edu.cn))

Department of Gastroenterology, The Shanghai Tenth People's Hospital, School of Life Sciences and Technology, Tongji University, Shanghai 200072, P. R. China.

Tel: 86-21-6598-1041

**Dingfeng Wu** ([dfw\\_bioinfo@126.com](mailto:dfw_bioinfo@126.com))

National Clinical Research Center for Child Health, the Children's Hospital, Zhejiang University School of Medicine, Hangzhou 310058, Zhejiang, P.R. China.

Tel: 86-571-8173-2391

**Email**

Lei Liu: [leiliu@tongji.edu.cn](mailto:leiliu@tongji.edu.cn)

Weili Lin: [linweili@tongji.edu.cn](mailto:linweili@tongji.edu.cn)

Suqi Cao: [suqi\\_cao@outlook.com](mailto:suqi_cao@outlook.com)

Liu Yang: [13676735203@163.com](mailto:13676735203@163.com)

Sheng Gao: [gaos@tongji.edu.cn](mailto:gaos@tongji.edu.cn)

Na Jiao: [jiaona@zju.edu.cn](mailto:jiaona@zju.edu.cn)

Lixin Zhu: [zhulx6@mail.sysu.edu.cn](mailto:zhulx6@mail.sysu.edu.cn)

Ruixin Zhu: [rxzhu@tongji.edu.cn](mailto:rxzhu@tongji.edu.cn)

Dingfeng Wu: [dfw\\_bioinfo@126.com](mailto:dfw_bioinfo@126.com)

1    **Abstract**

2    Early diagnosis of breast cancer remains a major clinical challenge. Liquid biopsy has  
3    become a powerful tool for cancer diagnosis by the aid of various the state-of-the-art  
4    detection technologies and artificial intelligence (AI) methods. Although the  
5    prediction performance is superior, the clinical application of existing AI models is  
6    greatly limited due to their poor interpretability. Here, we designed a miRNA-Gene-  
7    Module-Pathway-Disease biological decoding path, and developed BioDecoder  
8    thereof, a miRNA bio-interpretable neural network model for breast cancer early  
9    diagnosis. We demonstrated that BioDecoder could achieve early non-invasive  
10   diagnosis of breast cancer with a remarkable performance (AUC = 0.989) and showed  
11   strong generalizability in an external cohort (AUC = 0.890). Meanwhile, the  
12   biologically interpretable results of BioDecoder revealed that significant changes in  
13   metabolic pathway and oxidative phosphorylation were the main action pathways of  
14   circulating miRNA in breast cancer. Our study indicates that BioDecoder offers the  
15   promise of non-invasive early diagnosis of breast cancer and can be generalized to  
16   other cancers and corresponding biomarkers.

17

18   **Keywords:** breast cancer, circulating miRNA, biological interpretability, noninvasive  
19   diagnosis, liquid biopsy

20

## 21 **Introduction**

22 Breast cancer is one of the most common malignancies worldwide. According to the  
23 data released by GLOBOCAN 2020, female breast cancer has surpassed lung cancer  
24 as the most commonly diagnosed cancer with about 2.3 million (11.7%) new cases in  
25 2020, being the leading cause of cancer mortality among women <sup>1</sup>. Published research  
26 has revealed that the 5-year average survival rate of in situ female breast cancer  
27 reaches 99.0%, while those of regional- and distant-stage breast cancer are only 86.0%  
28 and 29.0%, respectively <sup>2</sup>. Lokong et al. <sup>3</sup> also reported that delayed diagnosis was an  
29 important reason for the higher breast cancer mortality in low-income countries.  
30 Therefore, early screening and diagnosis are essential to improve the overall survival  
31 rate of breast cancer. Tissue biopsy is the gold standard for clinical diagnosis of breast  
32 cancer; however, as an invasive test it is not suitable for early detection <sup>4</sup>. Currently,  
33 mammogram screening has been commonly used for early diagnosis of breast cancer  
34 but with risks of overdiagnosis and radiation exposure <sup>5-7</sup>. Hence, it is imperative to  
35 develop an accurate and non-invasive alternative tool for the early detection of breast  
36 cancer.

37 Liquid biopsy has become an important means of clinical early screening of cancer<sup>8</sup>.  
38 <sup>9</sup>. It can detect and analyze circulating tumor DNA (ctDNA), RNA (i.e., mRNA,  
39 miRNA), circulating tumor cells (CTC), and exosomes in plasma, urine, and other  
40 body fluids, providing information that is difficult to capture in medical imaging<sup>10, 11</sup>.  
41 Compared with tissue biopsy, liquid biopsy is non-invasive and easier to monitor  
42 tumor oncogenesis, metastasis and treatment response in real time <sup>12, 13</sup>. Although the

43 diagnosis of breast cancer is challenging due to heterogeneity<sup>14</sup>, circulating  
44 carcinoma proteins, circulating tumor cells, ctDNA, circulating miRNA, and other  
45 biomarkers have been applied in liquid biopsy research of breast cancer and achieved  
46 good predictive performance<sup>15, 16</sup>. Among them, the circulating miRNA plays an  
47 important role in tumor pathogenesis as oncogenes or tumor suppressors<sup>12, 17</sup>, making  
48 it a promising biomarker for breast cancer diagnosis. In previous research, using  
49 machine learning algorithms, a panel of five miRNAs (miR-1246, miR-1307-3p, miR-  
50 4634, miR-6861-5p and miR-6875-5p) was demonstrated to detect breast cancer with  
51 89.7% accuracy<sup>18</sup>, and another set of seven miRNAs including has-miR-126-5p and  
52 has-miR-144-3p showed predictive power for triple-negative breast cancer with an  
53 area under the receiver operating characteristic curve (AUC) of 0.814<sup>19</sup>.

54 Artificial intelligence (AI), including traditional machine learning algorithms and  
55 deep learning architectures, has greatly altered the research paradigm in medical  
56 science, and has brought new breakthroughs in precise diagnosis, treatment and  
57 prognosis of cancer<sup>20</sup>. Relying on the development of AI, liquid biopsy has become a  
58 powerful tool for cancer diagnosis<sup>21</sup>. The inherent black-box nature of most AI  
59 models, however, hinders their interpretability and widespread clinical application<sup>22</sup>.  
60 To help alleviate this problem, eXplainable AI (XAI)<sup>23</sup> has been introduced. Research  
61 have revealed that feature importance, model perturbation, feature association, and  
62 prior knowledge, etc., can be utilized to improve the interpretability of AI models<sup>24, 25</sup>.  
63 By integrating prior biological knowledge, bio-interpretable models (white-box  
64 solution) can be constructed to capture potential causality and uncover the underlying

65 biological process of diseases with better model credibility and generalizability,  
66 thereby promoting the research of disease mechanisms and the identification of  
67 therapeutic targets. For example, a recent study by Elmarakeby et al.<sup>26</sup> have  
68 demonstrated the capacity of biological XAI model for revealing novel molecularly  
69 altered candidates and predicting the staging of prostate cancer patients. Consequently,  
70 development of a breast cancer early diagnostic biological XAI model promises great  
71 benefits for further popularizing the clinical application of breast cancer liquid biopsy.

72 This study was undertaken to design a miRNA biological decoding path (miBDP)  
73 and develop BioDecoder, a miRNA bio-interpretable neural network model, for breast  
74 cancer early screening and diagnosis. Integrating prior biological knowledge and AI  
75 technology, BioDecoder dramatically ameliorated its biological interpretation ability  
76 under the premise of ensuring prediction performance. The findings drawing from  
77 BioDecoder provide new insights into the pathogenesis and treatment of breast cancer.

78

## 79 **Results**

80 A set of 4113 serum samples, including 2833 control samples (i.e., 2686 non-cancer  
81 samples, 93 prostate disease samples and 54 benign breast disease samples) and 1280  
82 breast cancer samples, and corresponding profiles of 2540 circulating miRNAs were  
83 obtained as the discovery cohort (Table S1)<sup>18</sup>. We developed a miRNA bio-  
84 interpretable neural network model (BioDecoder) to diagnose breast cancer, whose  
85 performance was compared with traditional black-box models (i.e., random forest [RF]  
86 and fully connected neural network [FCN]). The potential mechanism of miRNA in

87 breast cancer was then explained through BioDecoder. Finally, the predictive  
88 performance of BioDecoder was validated on an external cohort (11 control samples  
89 and 122 breast cancer samples, Table S2) by transfer learning (Figure 1A).

90

### 91 **Differential circulating miRNAs as biomarkers for breast cancer diagnosis**

92 Circulating miRNAs in serum have potential for breast cancer diagnosis<sup>27, 28</sup>, which  
93 was confirmed in our discovery cohort (Figure 1B). Seven hundred and ten miRNAs  
94 with significant differences between breast cancer and control samples were screened  
95 out ( $|\log_2FC| > 1$  and  $FDR < 0.05$ ; FC: fold change), including 704 up-regulated  
96 miRNAs and 6 down-regulated miRNAs (Table S3). Among them, has-miR-1246 and  
97 has-miR-1307-3p, which were significantly overexpressed in breast cancer patients,  
98 have been proven to be potent combined markers for early detection of breast cancer  
99 in published studies, with a sensitivity of 97.3%, a specificity of 82.9%, and an  
100 accuracy of 89.7%<sup>18, 29</sup>.

101 These 710 differential miRNAs were mapped to 11,418 target genes in the  
102 miRTarBase database (Table S4). As shown in Figure 1C, the results of Kyoto  
103 encyclopedia of genes and genomes (KEGG) pathway enrichment analysis revealed  
104 that proteoglycans in cancer, hippo signaling pathway and signaling pathway  
105 regulating pluripotency of stem cells, etc. were regulated by differential miRNAs and  
106 might participate in the onset and progression of cancer. In particular, these target  
107 genes were also significantly enriched in breast cancer pathway ( $FDR < 0.001$ ; Table  
108 S5), which was consistent with the results of gene set enrichment analysis (GSEA)

109 (enrichment score = 0.758, FDR < 0.001; Figure 1D, Table S6).

110

### 111 **BioDecoder enabled precise diagnosis of breast cancer**

112 By leveraging the prior biological knowledge, a miRNA-Gene-Module-Pathway-  
113 Disease biological decoding path (miBDP) was extracted from databases to  
114 characterize the biological process of miRNAs in the body (Figure 2A). Based upon  
115 miBDP, we constructed the miRNA bio-interpretable neural network model  
116 (BioDecoder) for breast cancer diagnosis. The 710 differential miRNAs were fed into  
117 BioDecoder as input, and then 11,418 targeted genes, 116 modules and 70 pathways  
118 from miRTarBase and KEGG were used as hidden layers for information extraction  
119 (Table S4), followed by a disease layer that outputs the probability of breast cancer  
120 (Figure 2A and Figure S1). For comparison, similar neural network architecture was  
121 used in FCN. However, different from FCN, each neuron in BioDecoder represented a  
122 specific biological entity, and the links between adjacent layers were partially  
123 connected according to the real biological relationship, rather than fully connected  
124 (Figure S1). Moreover, in view of the class imbalance issue in the discovery cohort,  
125 the synthetic minority oversampling technique (SMOTE) was performed to balance  
126 the sample size of the two classes (i.e., control and cancer), thereby improving model  
127 stability (Figure 2B, C).

128 After 100 epochs training, the validation losses were minimized (Figure 2D) and the  
129 area under the receiver operating characteristic curves (AUC) was stable at the highest  
130 scores (Figure 2E). The results confirmed that RF, FCN and BioDecoder all had



131 excellent prediction performance (AUC > 0.97; Table 1, Figure 2F and G, and Figure  
132 S2). Nevertheless, the validation AUC of RF was significantly higher than its test  
133 AUC, suggesting an overfitting problem. BioDecoder showed a comparable  
134 performance to FCN although it had more restrictions on model architecture (Table 1).  
135 BioDecoder with oversampling achieved the best performance for predicting risk of  
136 breast cancer on the test set (AUC = 0.989, balanced accuracy = 0.960, precision =  
137 0.949, recall = 0.943) and was used for subsequent analysis.

138

139 **BioDecoder revealed the underlying pathological mechanisms of miRNA in**  
140 **breast cancer**

141 BioDecoder is a neural network architecture with bio-entity connections between  
142 adjacent layers (i.e., miRNA, gene, module and pathway), which can reflect the  
143 specific changes of these bio-entities in breast cancer. Ranking the pathways in  
144 BioDecoder by weights, it was found that several pathways, such as metabolic  
145 pathway, ribosome, oxidative phosphorylation, and DNA replication, were  
146 significantly different between the control and cancer samples ( $P < 0.001$ ), and were  
147 of prime importance to breast cancer early diagnosis (Figure 3A, B).

148 Specifically, hsa-miR-3659 and hsa-miR-190a-3p had high weights in the metabolic  
149 pathway (including 97 modules, 406 genes, and 403 miRNAs, Figure S3A) that has  
150 an important influence on breast cancer occurrence<sup>30</sup>. The ribosome pathway is  
151 involved in the proliferation and metastasis of breast cancer cells<sup>31-35</sup>, in which hsa-  
152 miR-17-3p and hsa-miR-3622b-3p were the key factors (Figure S3B). Oxidative

153 phosphorylation contained 10 energy metabolism modules (e.g., F-type ATPase and  
154 V-type ATPase), 84 genes, and 81 miRNAs (Figure 3C). A subset of miRNAs  
155 targeting these modules also obtained good diagnostic capabilities for breast cancer.  
156 For instance, a set of 38 miRNAs (such as hsa-miR-3146 and hsa-miR-330-3p) in the  
157 F-type ATPase module achieved excellent diagnostic performance (AUC = 0.953),  
158 while the only miRNA (hsa-miR-3664-3p) in the V-type ATPase module yielded an  
159 AUC up to 0.868 (Figure 3C). Interestingly, we found that some target genes of  
160 miRNAs could affect the prognosis of breast cancer (Figure 3D, E). Low expression  
161 of ATP5F1B ( $P < 0.001$ ) and ATP6AP137 ( $P < 0.001$ ) significantly improved the  
162 breast cancer prognosis, and the 5-year survival increased from 70% and 77% to 85%,  
163 respectively.

164

### 165 **Extended application and validation of BioDecoder**

166 The superior biological interpretability of BioDecoder opens up encouraging  
167 prospects in its clinical practice. As presented in Figure 4A, besides significantly  
168 distinguishing non-cancer and breast cancer samples ( $P = 2.666e-224$ ), BioDecoder  
169 could also accurately identify other diseases, such as prostate disease ( $P = 2.302e-9$ )  
170 and benign breast disease ( $P = 1.539e-12$ ). Meanwhile, although patients with benign  
171 breast disease were highly likely to develop cancer at miRNA level, the probability  
172 was still significantly lower than that of breast cancer patients ( $P = 0.040$ , Figure 4A).  
173 It indicated that BioDecoder has the potential for early screening of breast cancer.

174 BioDecoder contained the biological decoding path of miRNA, and the sample

175 distribution of each level in miBDP is presented in Figure 4B. At the miRNA level,  
176 the model could roughly distinguish between control and breast cancer samples;  
177 nevertheless, disease samples were chaotic at principal component analysis (PCA)  
178 space. As the decoding proceeded, the distinctions between different categories  
179 increased gradually. At the module and pathway levels, there were significant  
180 differences among breast cancer, prostate disease and non-cancer samples, while  
181 benign breast disease samples were close to breast cancer samples (Figure 4B).

182 To evaluate the robustness and generalization ability of BioDecoder, an external  
183 validation was performed by transfer learning. The external validation cohort included  
184 miRNA expression profiles of breast tissue from 122 breast tumor patients and 11  
185 healthy individuals<sup>36</sup>. The first four layers of BioDecoder were frozen, and only the  
186 weights of the output layer were updated in transfer learning (Figure 4C). Taking into  
187 consideration different sampling proportions (10%–70%) of the external training set,  
188 BioDecoder exhibited better generalizability than FCN—BioDecoder achieved an  
189 excellent diagnostic performance with only a few external training samples, yielding  
190 AUC up to 0.890 (Figure 4D, E).

191

## 192 **Discussion**

193 Breast cancer is the most common malignant cancer in women and its early diagnosis  
194 can effectively reduce mortality<sup>37</sup>. The accuracy of breast cancer early screening has  
195 always been the coalface of research<sup>2, 38</sup>. In this study, we designed a miRNA bio-  
196 interpretable neural network model, BioDecoder, for noninvasive diagnosis of breast

197 cancer. Based upon miRNA expression profile of serum sample, BioDecoder achieved  
198 superior predictive performance for breast cancer (area under the receiver operating  
199 characteristic curve [AUC] = 0.989). In addition, BioDecoder showed strong  
200 robustness and clinical generalizability (AUC = 0.890) through transfer learning, even  
201 for breast tissue samples.

202 Liquid biopsy has been commonly used in cancer diagnosis due to its high  
203 sensitivity and specificity, especially with the aid of artificial intelligence (AI)<sup>39, 40</sup>.  
204 Such black-box models, however, could hardly integrate into daily clinical practice  
205 owing to their poor bio-interpretability<sup>22</sup>. To alleviate this issue, here we developed  
206 BioDecoder based on the architecture of miRNA biological decoding path (miBDP,  
207 miRNA-Gene-Module-Pathway-Disease)<sup>24, 41</sup>. The bio-interpretable miBDP  
208 architecture not merely considerably reduces the number of parameters and enhances  
209 modeling efficiency (Figure S1)<sup>26</sup>, but also guarantees BioDecoder great benefits in  
210 digging into the pathogenesis of breast cancer and discovering potential therapeutic  
211 targets (Figure 2, 3). The construction of Biodecoder is a decoding process of miRNA  
212 expression information according to miBDP, in which different diseases and their  
213 stages can be effectively distinguished (Figure 4B). Besides the excellent predictive  
214 power, BioDecoder exhibited outstanding performance in transfer learning (Figure  
215 4D), implying that biologically interpretable architecture has an edge in terms of  
216 model generalizability and clinical application.

217 Clinically, circulating miRNAs has been proved to be related to the pathogenesis  
218 of breast cancer<sup>28, 42</sup>, and can be used as biomarkers for breast cancer diagnosis, such

219 as has-miR-1246 and has-miR-1307-3p<sup>18, 29</sup>. In our results, 710 differential miRNAs  
220 were significantly enriched in breast cancer related pathways. Through the biological  
221 interpretation of miBDP, metabolism and oxidative phosphorylation were found to be  
222 the key pathways for miRNA to regulate the development of breast cancer, which  
223 indicates that metabolism may be reprogrammed in breast cancer<sup>27, 43, 44</sup>. Moreover,  
224 under the regulation of miRNAs, some genes, such as ATP5F1B and ATP6AP1, could  
225 affect the prognosis of breast cancer. Studies have shown that the increased  
226 expression of genes in oxidative phosphorylation pathway plays an major role in the  
227 immunotherapeutic drug resistance of breast cancer, which could be reversed by the  
228 knockdown or inhibition of ATP synthase<sup>45</sup>. Our findings suggests that BioDecoder's  
229 interpretability can offer new thoughts for refining clinical diagnosis and precise  
230 treatment of breast cancer.

231 Although BioDecoder uncovered the key pathways for the onset and progression of  
232 breast cancer, the mechanism of miRNA targeting these pathways still needs  
233 experimental verification. In essence, the interpretability of BioDecoder comes from  
234 prior biological knowledge, and therefore detailed biological knowledge (e.g., genetic  
235 information, clinical characteristics, and various molecular experimental data) can  
236 improve model performance in capturing the real causality. Also, the transferability  
237 and predictive performance of similar architecture applied to other biomarkers and  
238 diseases need to be further evaluated.

239

240 **Conclusions**

241 Our study proposed a bio-interpretable neural network architecture, namely  
242 BioDecoder, which can accurately diagnose breast cancer and reveal the potential  
243 mechanism of miRNA in breast cancer. Based on reliable prior knowledge, this bio-  
244 interpretable architecture has great potential to be applied to other types of biomarkers  
245 and diseases.

246

## 247 **Methods**

### 248 **Discovery cohort**

249 The data used in this work can be acquired from the ArrayExpress database  
250 (<https://www.ebi.ac.uk/biostudies/arrayexpress>). The discovery cohort (E-GEOD-  
251 73002, Table S1) consists of 1280 serum samples from breast cancer patients and  
252 2833 serum samples from control samples (i.e., 2686 non-cancer samples, 93 prostate  
253 disease samples and 54 benign breast disease samples)<sup>18</sup>. Samples from breast cancer  
254 patients with the following characteristics were excluded: (1) given drugs before  
255 serum collection and (2) with concurrent or previously diagnosed advanced cancer in  
256 other organs. Serum samples of control samples with no history of cancer or  
257 hospitalization within the past 3 months were included for analysis. The miRNA  
258 expression profiles of all samples were obtained by microarray analysis and verified  
259 by quantitative Reverse Transcription-Polymerase Chain Reaction (RT-PCR).

260

### 261 **External validation cohort**

262 The external cohort includes 133 Spanish breast tissue samples (i.e., 122 breast cancer

263 samples and 11 control samples, Table S2), which was reported by Matamala et. al.  
264 (<https://www.ncbi.nlm.nih.gov/geo/query/acc.cgi?acc=GSE58606>)<sup>36</sup>. The miRNA  
265 expression profiles of all tissue samples were obtained by microarray analysis and  
266 verified by quantitative RT-PCR.

267

## 268 **Experimental setup**

269 A stratified random sampling was performed to divide the discovery cohort into two  
270 subsets: 60% for training set (768 breast cancer samples and 1700 control samples)  
271 and 40% for test set (512 breast cancer samples and 1133 control samples). Then the  
272 training set was oversampled to balance the number of positive and negative samples  
273 using the synthetic minority oversampling technique (SMOTE) algorithm of the  
274 *imblearn* package (version 0.9.1)<sup>46</sup>.

275

## 276 **Construction of artificial intelligence (AI) models**

### 277 *Random Forest (RF) model*

278 The RF model was constructed by the *scikit-learn* (version 0.21.3) package. In the  
279 training set, we performed feature selection through recursive feature elimination  
280 using cross-validation. Subsequently, a 5-fold cross-validation and grid search were  
281 used for model training and hyperparameter tuning. Area under the receiver operating  
282 characteristic curve (AUC) was used as the primary evaluation measure for model  
283 selection. Finally, the RF model was constructed using the optimal features and  
284 hyperparameters (`max_features = 0.1`, `n_estimators = 101`, `max_depth = None`,

285 max\_samples = None, criterion = gini, and class\_weight = balanced).

286 *BioDecoder and Fully Connected Neural Network (FCN) models*

287 The neural network models were constructed by the *pytorch* (version 1.13) package <sup>47</sup>.

288 The architecture of neural network consisted of one input layer (miRNA), three

289 hidden layers (gene, module and pathway), and one output layer (disease). The input

290 and hidden layers included linear function, rectified linear unit (ReLU) function,

291 batch normalization (BatchNorm1d) function and dropout function, while the output

292 layer contained only linear and BatchNorm1d functions, followed by the softmax

293 function for classification (Figure S1). To make each layer biologically interpretable,

294 we fixed the number of neurons according to the corresponding miRNA, gene,

295 module and pathway, and links between adjacent layers were partially connected

296 through a mask matrix, which was a boolean matrix representing real biological

297 connections between layers, thereby providing biological meaning for the neurons

298 between each layer. Notably, FCN had the same configuration as BioDecoder, except

299 that the layers of FCN were fully connected and were not biologically meaningful

300 (Figure S1).

301 The model was trained by Adam optimizer <sup>48</sup> (learning rate = 0.01, batch size = 64,

302 and minimal epoch = 100) with batch gradient descent, and used cross entropy as the

303 loss function. To prevent overfitting, the model was early stopped when the validation

304 loss was minimized. The model was then applied to the test set to assess model

305 performance. Evaluation metrics such as balanced accuracy, precision, recall and

306 AUC were reported.



307

### 308 **Assessment of transfer learning robustness**

309 Transfer learning<sup>49,50</sup> was used to validate the predictive performance of BioDecoder  
310 on an external cohort. The first four layers of the BioDecoder were frozen, while the  
311 weights of pathway-disease were retrained by external training set (Figure S1). By the  
312 stratified random sampling, the external cohort was divided into two unequal parts—  
313 that is, the external training set and external test set. The training set was used to tune  
314 the transfer learning model (at the sampling proportion from 10% to 70%), and the  
315 test set was used to evaluate the model performance.

316

### 317 **Statistics Analysis**

318 All statistical analysis was performed using *R* software (version 4.2.1) or *Python*  
319 software (version 3.9.6). Statistical significance was assessed using the Wilcoxon  
320 signed-rank test, unless otherwise specified. The differentially expressed miRNAs  
321 between breast cancer samples and control samples were established using a linear  
322 regression model in the R package *limma*<sup>51</sup>. The resulting *P* values were corrected  
323 using the Benjamini-Hochberg (BH) method. The biomarkers that were differentially  
324 expressed miRNAs were screened by false discovery rate (FDR) < 0.05 and fold  
325 change (FC) > 2, or FDR < 0.05 and FC < 0.5. The corresponding target genes of  
326 differential miRNAs were obtained from miRTarBase database<sup>52</sup>, and module and  
327 pathway information were extracted from the Kyoto encyclopedia of genes and  
328 genomes (KEGG). Pathway enrichment analysis was performed using the R packages

329 *clusterProfiler*<sup>53</sup> and *GESA*<sup>54</sup>. The PCA method from the python package *scikit-learn*  
330 was applied for principal component analysis (PCA). Gene expression data for breast  
331 cancer survival analysis were collected from the Human Protein Atlas  
332 (<https://www.proteinatlas.org/>). The network graph was visualized by *Cytoscape*  
333 (<https://cytoscape.org/>, version 3.9.0).

334

### 335 **Abbreviations**

336 AI, Artificial Intelligence;  
337 AUC, Area Under the ROC Curve  
338 BH, Benjamini-Hochberg;  
339 CTC, Circulating Tumor Cells;  
340 ctDNA, circulating tumor DNA;  
341 ctRNA, circulating tumor RNA;  
342 GSEA, Gene Set Enrichment Analysis  
343 FC, Fold Change;  
344 FCN, Fully Connected Neural Network;  
345 FDR, False Discovery Rate;  
346 KEGG, Kyoto Encyclopedia of Genes and Genomes;  
347 miBDP, miRNA Biological Decoding Path;  
348 OS, Oversampling;  
349 RF, random forest;  
350 ROC, Receiver Operating Characteristic;  
351 RT-PCR, Reverse Transcription-Polymerase Chain Reaction;  
352 SMOTE, Synthetic Minority Oversampling Technique;  
353 XAI, eXplainable Artificial Intelligence;

354

### 355 **Key Points**

356 ● Artificial intelligence technology combines prior biological knowledge greatly

357 improves the model interpretability while ensuring the prediction performance.  
358 ● BioDecoder achieved accurate early diagnosis of breast cancer and showed strong  
359 robustness and clinical expandability.  
360 ● The pathways, such as metabolic, ribosome, oxidative phosphorylation and DNA  
361 replication, played key roles in the pathogenesis of breast cancer.

362

### 363 **Acknowledgements**

364 We are grateful for all the subjects who participated in this study. BioDecoder  
365 framework and its biological prior knowledge schematic were created with *BioRender*  
366 (<https://biorender.com/>), and network graph were draw with *cytoscape*.

367

### 368 **Authors' contributions**

369 Dingfeng Wu and Ruixin Zhu conceived and designed the project. Each author has  
370 contributed significantly to the submitted work. Lei Liu, Suqi Cao and Liu Yang was  
371 responsible for the data analysis and drafted the manuscript. Lixin Zhu, Sheng Gao,  
372 Weili Lin, Na Jiao, RuixinZhu and Dingfeng Wu revised the manuscript. All authors  
373 read and approved the final manuscript.

374

### 375 **Funding**

376 This work was supported by the National Natural Science Foundation of China  
377 (32200529 to Dingfeng Wu, 82170542 to Ruixin Zhu, 92251307 to Ruixin Zhu,  
378 82000536 to Na Jiao), and the National Key Research and Development Program of  
379 China (2021YFF0703700/2021YFF0703702 to Ruixin Zhu).

380

### 381 **Ethics approval and consent to participate**

382 N/A

383

### 384 **Consent for publication**

385 Obtained.

386

### 387 **Competing interests**

388 The authors declared no potential conflicts of interest in terms of the research,  
389 authorship, and/or publication of this article.

390

### 391 **Availability of data and materials**

392 No new sequencing data was used in this paper. All the software packages used in this  
393 study are open source and publicly available and the code used in this study is  
394 available on GitHub at <https://github.com/ddhmed/BioDecoder>.

395

### 396 **Reference**

- 397 1. Sung H, Ferlay J, Siegel RL, et al. Global Cancer Statistics 2020: GLOBOCAN Estimates of Incidence  
398 and Mortality Worldwide for 36 Cancers in 185 Countries. *CA: A Cancer Journal for Clinicians*.  
399 2021;71(3):209-249. doi:10.3322/caac.21660
- 400 2. Siegel RL, Miller KD, Fuchs HE, Jemal A. Cancer statistics, 2022. *CA Cancer J Clin*. Jan 2022;72(1):7-  
401 33. doi:10.3322/caac.21708
- 402 3. Lukong KE, Ogunbolude Y, Kamdem JP. Breast cancer in Africa: prevalence, treatment options,  
403 herbal medicines, and socioeconomic determinants. *Breast Cancer Res Treat*. Nov 2017;166(2):351-  
404 365. doi:10.1007/s10549-017-4408-0
- 405 4. Lowry KP, Bissell MCS, Miglioretti DL, et al. Breast Biopsy Recommendations and Breast Cancers  
406 Diagnosed during the COVID-19 Pandemic. *Radiology*. May 2022;303(2):287-294.  
407 doi:10.1148/radiol.2021211808
- 408 5. Ryser MD, Lange J, Inoue LYT, et al. Estimation of Breast Cancer Overdiagnosis in a U.S. Breast  
409 Screening Cohort. *Ann Intern Med*. Apr 2022;175(4):471-478. doi:10.7326/m21-3577
- 410 6. Cardoso F, Kyriakides S, Ohno S, et al. Early breast cancer: ESMO Clinical Practice Guidelines for  
411 diagnosis, treatment and follow-up†. *Ann Oncol*. Aug 1 2019;30(8):1194-1220.  
412 doi:10.1093/annonc/mdz173
- 413 7. Jatoi I, Pinsky PF. Breast Cancer Screening Trials: Endpoints and Overdiagnosis. *J Natl Cancer Inst*.  
414 Sep 4 2021;113(9):1131-1135. doi:10.1093/jnci/djaa140
- 415 8. Liu NN, Jiao N, Tan JC, et al. Multi-kingdom microbiota analyses identify bacterial-fungal  
416 interactions and biomarkers of colorectal cancer across cohorts. *Nat Microbiol*. Feb 2022;7(2):238-250.  
417 doi:10.1038/s41564-021-01030-7
- 418 9. Alix-Panabières C, Pantel K. Liquid Biopsy: From Discovery to Clinical Application. *Cancer Discov*.

- 419 Apr 2021;11(4):858-873. doi:10.1158/2159-8290.Cd-20-1311
- 420 10. Krebs MG, Malapelle U, André F, et al. Practical Considerations for the Use of Circulating Tumor  
421 DNA in the Treatment of Patients With Cancer: A Narrative Review. *JAMA Oncology*. 2022;8(12):1830-  
422 1839. doi:10.1001/jamaoncol.2022.4457
- 423 11. Yu W, Hurley J, Roberts D, et al. Exosome-based liquid biopsies in cancer: opportunities and  
424 challenges. *Ann Oncol*. Apr 2021;32(4):466-477. doi:10.1016/j.annonc.2021.01.074
- 425 12. Raza A, Khan AQ, Inchakalody VP, et al. Dynamic liquid biopsy components as predictive and  
426 prognostic biomarkers in colorectal cancer. *J Exp Clin Cancer Res*. Mar 15 2022;41(1):99.  
427 doi:10.1186/s13046-022-02318-0
- 428 13. Nikanjam M, Kato S, Kurzrock R. Liquid biopsy: current technology and clinical applications. *J*  
429 *Hematol Oncol*. Sep 12 2022;15(1):131. doi:10.1186/s13045-022-01351-y
- 430 14. Giordano SB, Gradishar W. Breast cancer: updates and advances in 2016. *Curr Opin Obstet*  
431 *Gynecol*. Feb 2017;29(1):12-17. doi:10.1097/GCO.0000000000000343
- 432 15. Zhou E, Li Y, Wu F, et al. Circulating extracellular vesicles are effective biomarkers for predicting  
433 response to cancer therapy. *EBioMedicine*. May 2021;67:103365. doi:10.1016/j.ebiom.2021.103365
- 434 16. Luo H, Wei W, Ye Z, Zheng J, Xu RH. Liquid Biopsy of Methylation Biomarkers in Cell-Free DNA.  
435 *Trends Mol Med*. May 2021;27(5):482-500. doi:10.1016/j.molmed.2020.12.011
- 436 17. Zhang S, Zhou Y, Wang Y, et al. The mechanistic, diagnostic and therapeutic novel nucleic acids for  
437 hepatocellular carcinoma emerging in past score years. *Brief Bioinform*. Mar 22 2021;22(2):1860-1883.  
438 doi:10.1093/bib/bbaa023
- 439 18. Shimomura A, Shiino S, Kawauchi J, et al. Novel combination of serum microRNA for detecting  
440 breast cancer in the early stage. *Cancer Sci*. Mar 2016;107(3):326-34. doi:10.1111/cas.12880
- 441 19. Kahraman M, Röske A, Laufer T, et al. MicroRNA in diagnosis and therapy monitoring of early-  
442 stage triple-negative breast cancer. *Sci Rep*. Aug 2 2018;8(1):11584. doi:10.1038/s41598-018-29917-2
- 443 20. Topol EJ. High-performance medicine: the convergence of human and artificial intelligence. *Nat*  
444 *Med*. Jan 2019;25(1):44-56. doi:10.1038/s41591-018-0300-7
- 445 21. Cucchiara F, Petrini I, Romei C, et al. Combining liquid biopsy and radiomics for personalized  
446 treatment of lung cancer patients. State of the art and new perspectives. *Pharmacol Res*. Jul  
447 2021;169:105643. doi:10.1016/j.phrs.2021.105643
- 448 22. Talukder A, Barham C, Li X, Hu H. Interpretation of deep learning in genomics and epigenomics.  
449 *Brief Bioinform*. May 20 2021;22(3)doi:10.1093/bib/bbaa177
- 450 23. Gunning D, Aha D. DARPA's Explainable Artificial Intelligence (XAI) Program. *AI Magazine*.  
451 2019;40(2):44-58. doi:<https://doi.org/10.1609/aimag.v40i2.2850>
- 452 24. Novakovsky G, Dexter N, Libbrecht MW, Wasserman WW, Mostafavi S. Obtaining genetics  
453 insights from deep learning via explainable artificial intelligence. *Nat Rev Genet*. Oct 3  
454 2022;doi:10.1038/s41576-022-00532-2
- 455 25. Linardatos P, Papastefanopoulos V, Kotsiantis S. Explainable AI: A Review of Machine Learning  
456 Interpretability Methods. *Entropy (Basel)*. Dec 25 2020;23(1)doi:10.3390/e23010018
- 457 26. Elmarakeby HA, Hwang J, Arafeh R, et al. Biologically informed deep neural network for prostate  
458 cancer discovery. *Nature*. 2021;598(7880):348-352. doi:10.1038/s41586-021-03922-4
- 459 27. Kandettu A, Radhakrishnan R, Chakrabarty S, Sriharikrishnaa S, Kabekkodu SP. The emerging role  
460 of miRNA clusters in breast cancer progression. *Biochim Biophys Acta Rev Cancer*. Dec  
461 2020;1874(2):188413. doi:10.1016/j.bbcan.2020.188413
- 462 28. Soheilifar MH, Masoudi-Khoram N, Madadi S, et al. Angioregulatory microRNAs in breast cancer:

- 463 Molecular mechanistic basis and implications for therapeutic strategies. *J Adv Res.* Mar 2022;37:235-  
464 253. doi:10.1016/j.jare.2021.06.019
- 465 29. Zhai LY, Li MX, Pan WL, et al. In Situ Detection of Plasma Exosomal MicroRNA-1246 for Breast  
466 Cancer Diagnostics by a Au Nanoflare Probe. *ACS Appl Mater Interfaces.* Nov 21 2018;10(46):39478-  
467 39486. doi:10.1021/acsami.8b12725
- 468 30. Wang T, Fahrman JF, Lee H, et al. JAK/STAT3-Regulated Fatty Acid  $\beta$ -Oxidation Is Critical for  
469 Breast Cancer Stem Cell Self-Renewal and Chemoresistance. *Cell Metab.* Jan 9 2018;27(1):136-150.e5.  
470 doi:10.1016/j.cmet.2017.11.001
- 471 31. Ebricht RY, Lee S, Wittner BS, et al. Deregulation of ribosomal protein expression and translation  
472 promotes breast cancer metastasis. *Science.* Mar 27 2020;367(6485):1468-1473.  
473 doi:10.1126/science.aay0939
- 474 32. Jin J, Qiu S, Wang P, et al. Cardamonin inhibits breast cancer growth by repressing HIF-1 $\alpha$ -  
475 dependent metabolic reprogramming. *J Exp Clin Cancer Res.* Aug 27 2019;38(1):377.  
476 doi:10.1186/s13046-019-1351-4
- 477 33. Chu W, Zhang X, Qi L, et al. The EZH2-PHACTR2-AS1-Ribosome Axis induces Genomic Instability  
478 and Promotes Growth and Metastasis in Breast Cancer. *Cancer Res.* Jul 1 2020;80(13):2737-2750.  
479 doi:10.1158/0008-5472.Can-19-3326
- 480 34. Li X, Wang M, Li S, et al. HIF-1-induced mitochondrial ribosome protein L52: a mechanism for  
481 breast cancer cellular adaptation and metastatic initiation in response to hypoxia. *Theranostics.*  
482 2021;11(15):7337-7359. doi:10.7150/thno.57804
- 483 35. Chu W, Zhang X, Qi L, et al. The EZH2-PHACTR2-AS1-Ribosome Axis induces Genomic Instability  
484 and Promotes Growth and Metastasis in Breast Cancer. *Cancer Research.* 2020;80(13):2737-2750.  
485 doi:10.1158/0008-5472.can-19-3326
- 486 36. Matamala N, Vargas MT, González-Cámpora R, et al. Tumor MicroRNA Expression Profiling  
487 Identifies Circulating MicroRNAs for Early Breast Cancer Detection. *Clinical Chemistry.*  
488 2015;61(8):1098-1106. doi:10.1373/clinchem.2015.238691
- 489 37. Mann RM, Hooley R, Barr RG, Moy L. Novel Approaches to Screening for Breast Cancer. *Radiology.*  
490 Nov 2020;297(2):266-285. doi:10.1148/radiol.2020200172
- 491 38. Alba-Bernal A, Lavado-Valenzuela R, Domínguez-Recio ME, et al. Challenges and achievements of  
492 liquid biopsy technologies employed in early breast cancer. *EBioMedicine.* Dec 2020;62:103100.  
493 doi:10.1016/j.ebiom.2020.103100
- 494 39. Li J, Guan X, Fan Z, et al. Non-Invasive Biomarkers for Early Detection of Breast Cancer. *Cancers*  
495 *(Basel).* Sep 27 2020;12(10)doi:10.3390/cancers12102767
- 496 40. Hamam R, Hamam D, Alsaleh KA, et al. Circulating microRNAs in breast cancer: novel diagnostic  
497 and prognostic biomarkers. *Cell Death Dis.* Sep 7 2017;8(9):e3045. doi:10.1038/cddis.2017.440
- 498 41. Doshi-Velez F, Kim B. Towards A Rigorous Science of Interpretable Machine Learning.  
499 2017:arXiv:1702.08608. Accessed February 01, 2017.  
500 <https://ui.adsabs.harvard.edu/abs/2017arXiv170208608D>
- 501 42. Nassar FJ, Nasr R, Talhouk R. MicroRNAs as biomarkers for early breast cancer diagnosis,  
502 prognosis and therapy prediction. *Pharmacol Ther.* Apr 2017;172:34-49.  
503 doi:10.1016/j.pharmthera.2016.11.012
- 504 43. Viale A, Pettazoni P, Lyssiotis CA, et al. Oncogene ablation-resistant pancreatic cancer cells  
505 depend on mitochondrial function. *Nature.* Oct 30 2014;514(7524):628-32. doi:10.1038/nature13611
- 506 44. Bacci M, Giannoni E, Fearn A, et al. miR-155 Drives Metabolic Reprogramming of ER+ Breast

507 Cancer Cells Following Long-Term Estrogen Deprivation and Predicts Clinical Response to Aromatase  
 508 Inhibitors. *Cancer Res.* Mar 15 2016;76(6):1615-26. doi:10.1158/0008-5472.Can-15-2038  
 509 45. Gale M, Li Y, Cao J, et al. Acquired Resistance to HER2-Targeted Therapies Creates Vulnerability to  
 510 ATP Synthase Inhibition. *Cancer Res.* Feb 1 2020;80(3):524-535. doi:10.1158/0008-5472.CAN-18-3985  
 511 46. Chawla NV, Bowyer KW, Hall LO, Kegelmeyer WP. SMOTE: Synthetic Minority over-Sampling  
 512 Technique. *J Artif Int Res.* 2002;16(1):321–357.  
 513 47. Paszke A, Gross S, Massa F, et al. PyTorch: An Imperative Style, High-Performance Deep Learning  
 514 Library. 2019;  
 515 48. Kingma D, Ba J. Adam: A Method for Stochastic Optimization. *International Conference on*  
 516 *Learning Representations.* 2014;  
 517 49. Novakovsky G, Saraswat M, Fornes O, Mostafavi S, Wasserman WW. Biologically relevant transfer  
 518 learning improves transcription factor binding prediction. *Genome Biology.*  
 519 2021;22(1)doi:10.1186/s13059-021-02499-5  
 520 50. Gao Y, Cui Y. Deep transfer learning for reducing health care disparities arising from biomedical  
 521 data inequality. *Nat Commun.* Oct 12 2020;11(1):5131. doi:10.1038/s41467-020-18918-3  
 522 51. Smyth GK. limma: Linear Models for Microarray Data. In: Gentleman R, Carey VJ, Huber W,  
 523 Irizarry RA, Dudoit S, eds. *Bioinformatics and Computational Biology Solutions Using R and*  
 524 *Bioconductor.* Springer New York; 2005:397-420.  
 525 52. Huang H-Y, Lin Y-C-D, Li J, et al. miRTarBase 2020: updates to the experimentally validated  
 526 microRNA-target interaction database. *Nucleic acids research.* 2020;48(D1):D148-D154.  
 527 doi:10.1093/nar/gkz896  
 528 53. Yu G, Wang L-G, Han Y, He Q-Y. clusterProfiler: an R package for comparing biological themes  
 529 among gene clusters. *OMICS.* 2012;16(5):284-287. doi:10.1089/omi.2011.0118  
 530 54. Subramanian A, Tamayo P, Mootha VK, et al. Gene set enrichment analysis: a knowledge-based  
 531 approach for interpreting genome-wide expression profiles. *Proc Natl Acad Sci U S A.* Oct 25  
 532 2005;102(43):15545-50. doi:10.1073/pnas.0506580102

533

534 **Table**

535 **Table 1. The predictive performance of random forest, fully connected neural**  
 536 **network, and BioDecoder.**

| Model                   | Training | Validation |       | Test  |           |           |        |
|-------------------------|----------|------------|-------|-------|-----------|-----------|--------|
|                         | Loss     | Loss       | AUC   | AUC   | Accuracy* | Precision | Recall |
| <b>Raw data</b>         |          |            |       |       |           |           |        |
| RF                      | NA       | NA         | 0.991 | 0.977 | 0.980     | 0.967     | 0.969  |
| FCN                     | 0.128    | 0.352      | 0.990 | 0.989 | 0.964     | 0.960     | 0.945  |
| BioDecoder              | 0.889    | 0.359      | 0.988 | 0.986 | 0.955     | 0.948     | 0.934  |
| <b>Oversampled data</b> |          |            |       |       |           |           |        |
| RF                      | NA       | NA         | 0.995 | 0.977 | 0.979     | 0.963     | 0.971  |
| FCN                     | 0.125    | 0.348      | 0.989 | 0.988 | 0.958     | 0.951     | 0.938  |
| BioDecoder              | 0.246    | 0.353      | 0.988 | 0.989 | 0.960     | 0.949     | 0.943  |

537 \* Balanced accuracy; RF: random forest; FCN: fully connected neural network; NA: not

538 applicable.

539

## 540 **Figure Legends**

541 **Figure 1. Differential changes of circulating miRNAs in breast cancer.** (A) The  
542 workflow of this study for breast cancer diagnosis based on circulating miRNAs. (B)  
543 Principal component analysis (PCA) of miRNA profiles showed different distribution  
544 between breast cancer and control samples in the discovery cohort. (C) The top 25  
545 KEGG pathways enriched by the target genes of differential miRNAs. (D) Gene set  
546 enrichment analysis results of differential miRNA target genes in breast cancer  
547 pathways.

548 **Figure 2. The architecture and performance of BioDecoder.** (A) BioDecoder  
549 framework. This figure was created with BioRender.com (<https://biorender.com/>). (B)  
550 The distribution of control samples and breast cancer samples in the discovery cohort.  
551 (C) The distribution of control samples and breast cancer samples in the discovery  
552 cohort after oversampling. (D) The validation loss calculated by cross\_entropy  
553 function during model training. (E) The AUC scores obtained during model training.  
554 (F) AUC of BioDecoder-OS on the test set. (G) Confusion matrix of BioDecoder-OS  
555 on the test set. SMOTE: synthetic minority oversampling technique; FCN: fully  
556 connected neural network; OS: oversampling; AUC: area under the receiver operating  
557 characteristic curve.

558 **Figure 3. Biological interpretation of BioDecoder.** (A) The pathway importance  
559 ranked by weights. (B) Boxplot of differential expression between control and breast



560 cancer samples for the four important pathways (metabolic pathway, ribosome,  
561 oxidative phosphorylation, and DNA expression). (C) The biological network of  
562 oxidative phosphorylation pathway. Logistic regression was performed using  
563 miRNAs in each module and the receiver operating characteristic curves (ROC) were  
564 showed. (D). Survival curves of breast cancer patients based on ATP5F1B expression.  
565 Survival curves of breast cancer patients based on ATP6AP1 expression. \*\*\* ,  $P <$   
566 0.001.

567 **Figure 4. Application and validation of BioDecoder.** (A) The probability of breast  
568 cancer predicted by BioDecoder in non-cancer, prostate disease, benign breast disease  
569 and breast cancer samples. The differences between groups were shown. (B) The  
570 distribution of test set samples at different miRNA biological decoding path levels of  
571 BioDecoder. (C) The flow chart of transfer learning for applying BioDecoder on the  
572 external cohort. (D) The transfer learning performance of BioDecoder and fully  
573 connected neural network on external cohort with different sampling proportions of  
574 the training set. (E) The receiver operating characteristic curve of BioDecoder's  
575 transfer learning performance on the full external cohort. OS: oversampling.

576

#### 577 **Supplementary material**

578 Figure S1. The neural network architecture of fully connected neural network,  
579 BioDecoder and transfer learning.

580 Figure S2. The receiver operating characteristic curve and confusion matrix of  
581 random forest, fully connected neural network and Biodecoder in raw data and  
582 oversampling data.

583 Figure S3. The biological network of metabolic pathway and ribosome pathway.

584 Table S1. Discovery cohort (E-GEOD-73002).

585 Table S2. The external validation cohort (GSE58606).

586 Table S3. The 710 miRNAs with significant differences between breast cancer and  
587 control samples.

588 Table S4. The correspondence of biological entries in miBDP.

589 Table S5. Pathway enrichment of miRNA targeted genes by clusterProfiler.

590 Table S6. Pathway enrichment of miRNA targeted genes by GSEA.

591

A

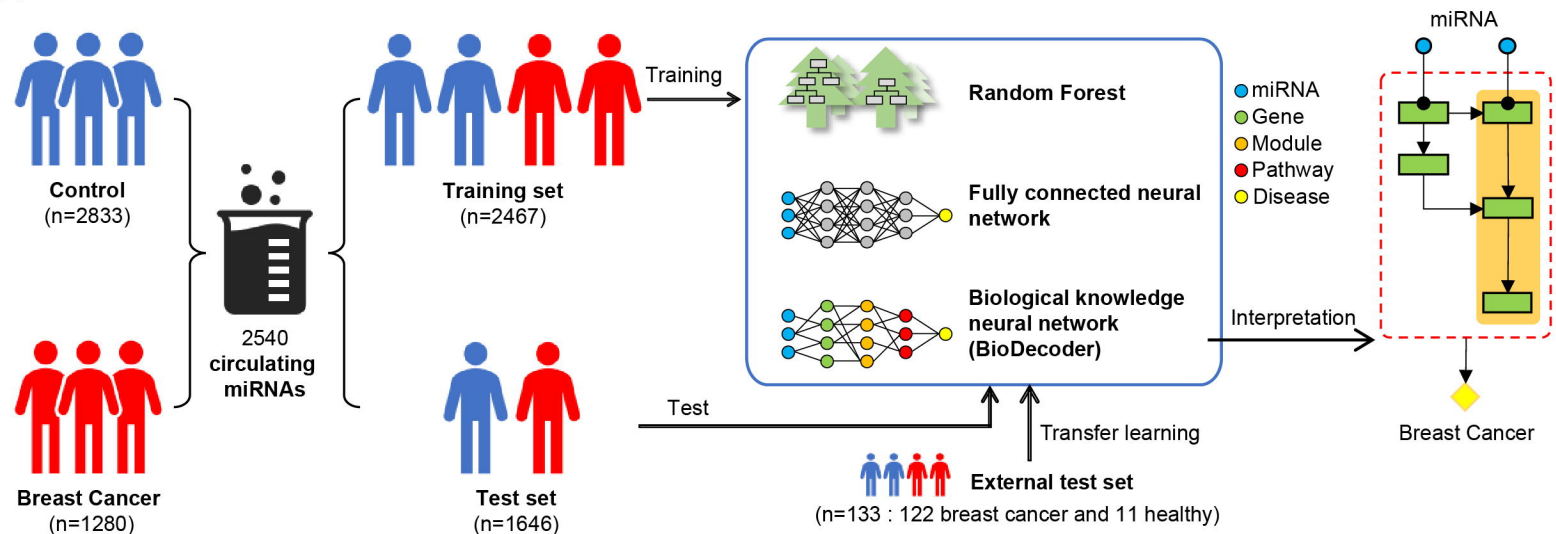

C

Top 25 KEGG pathways

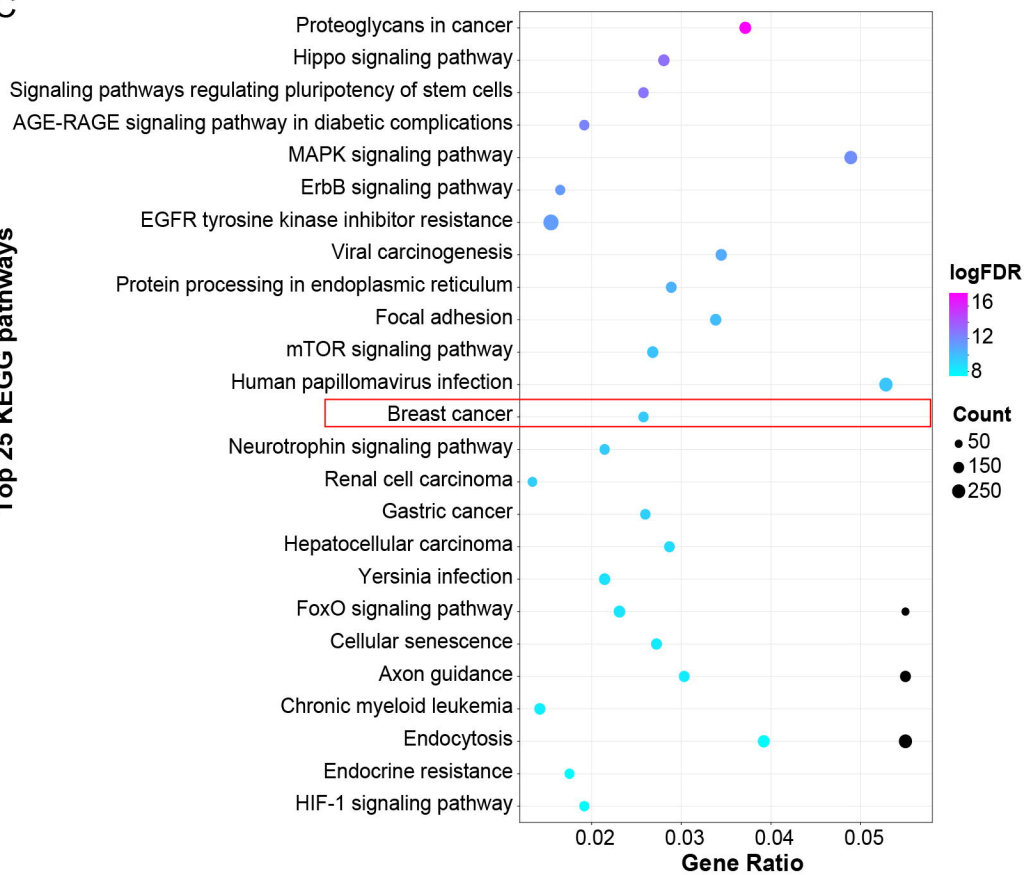

B

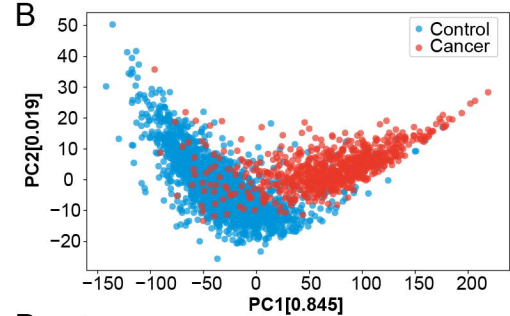

D

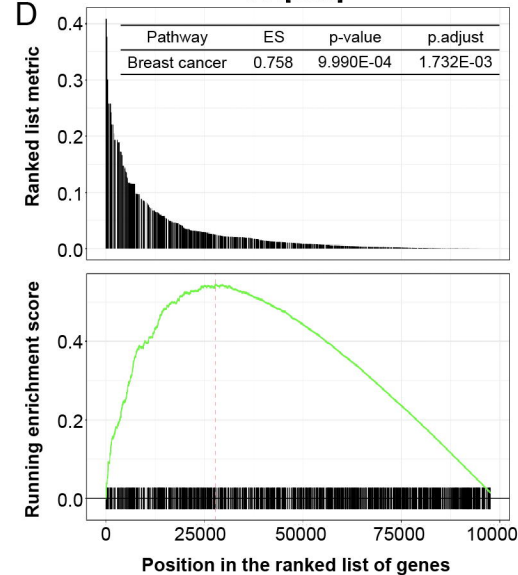

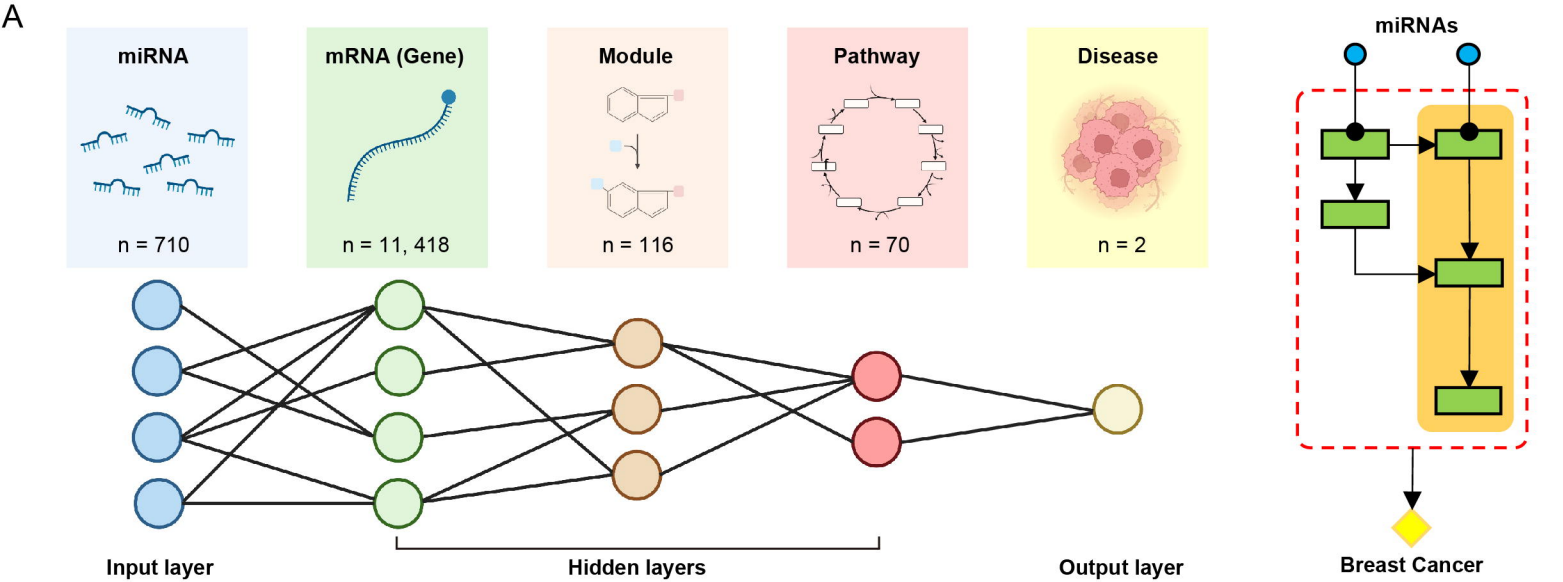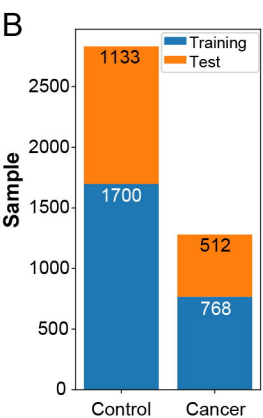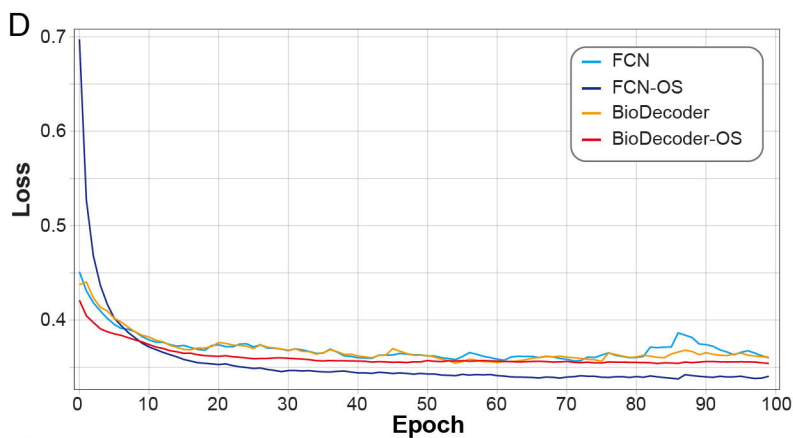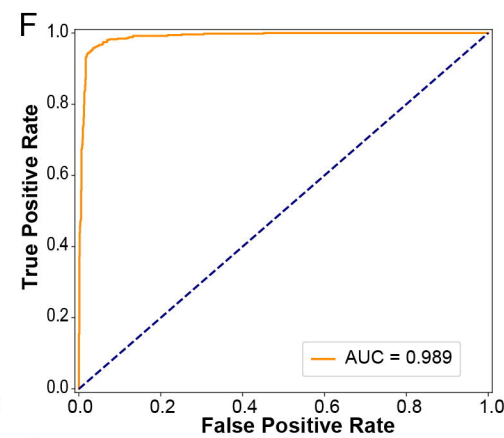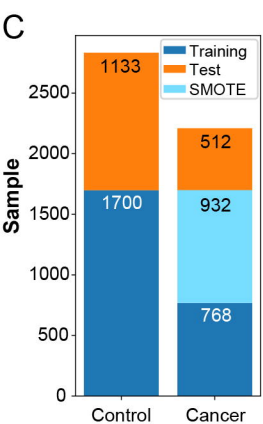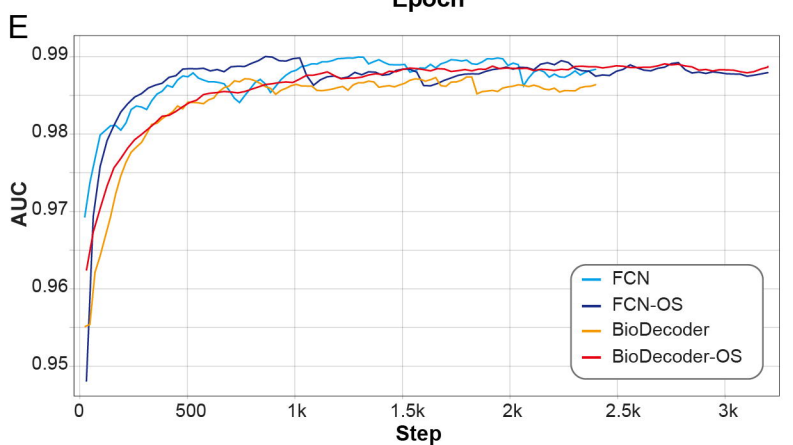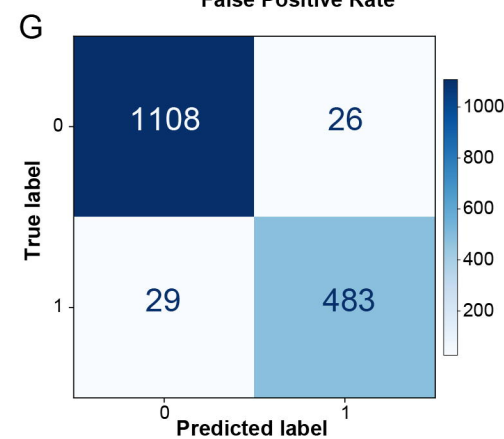

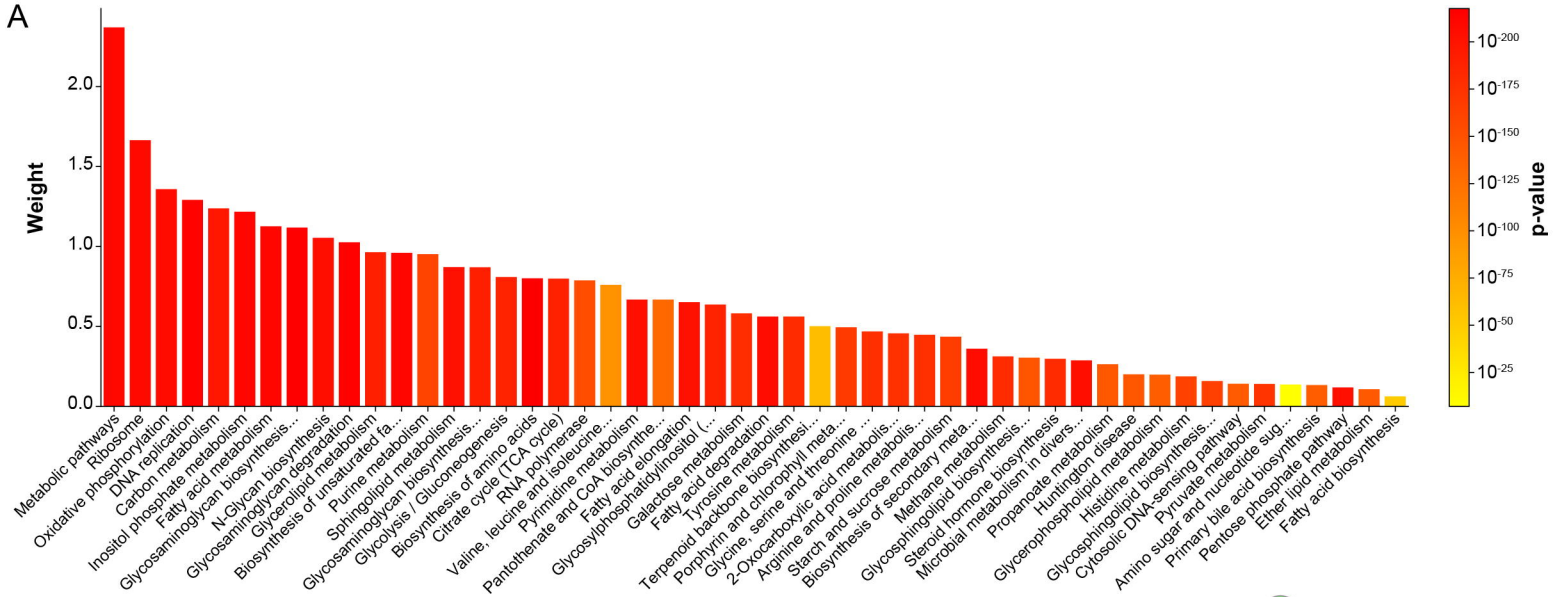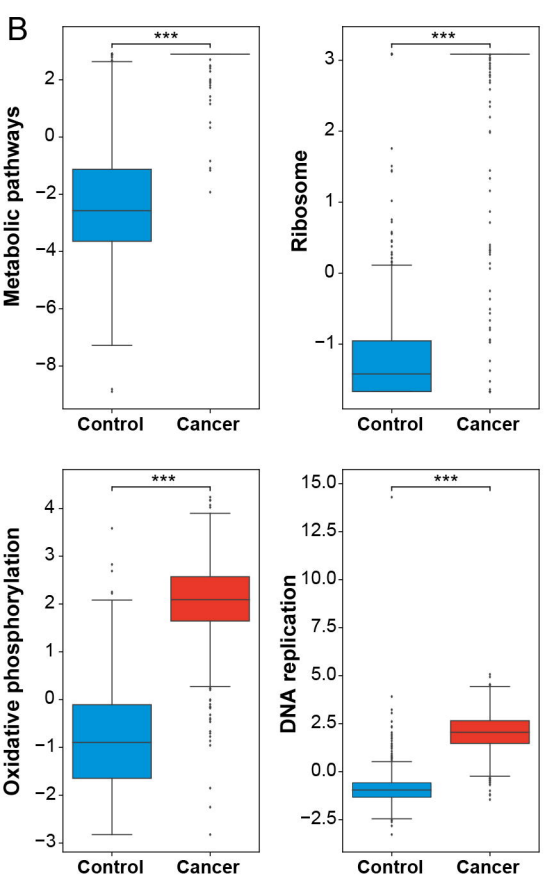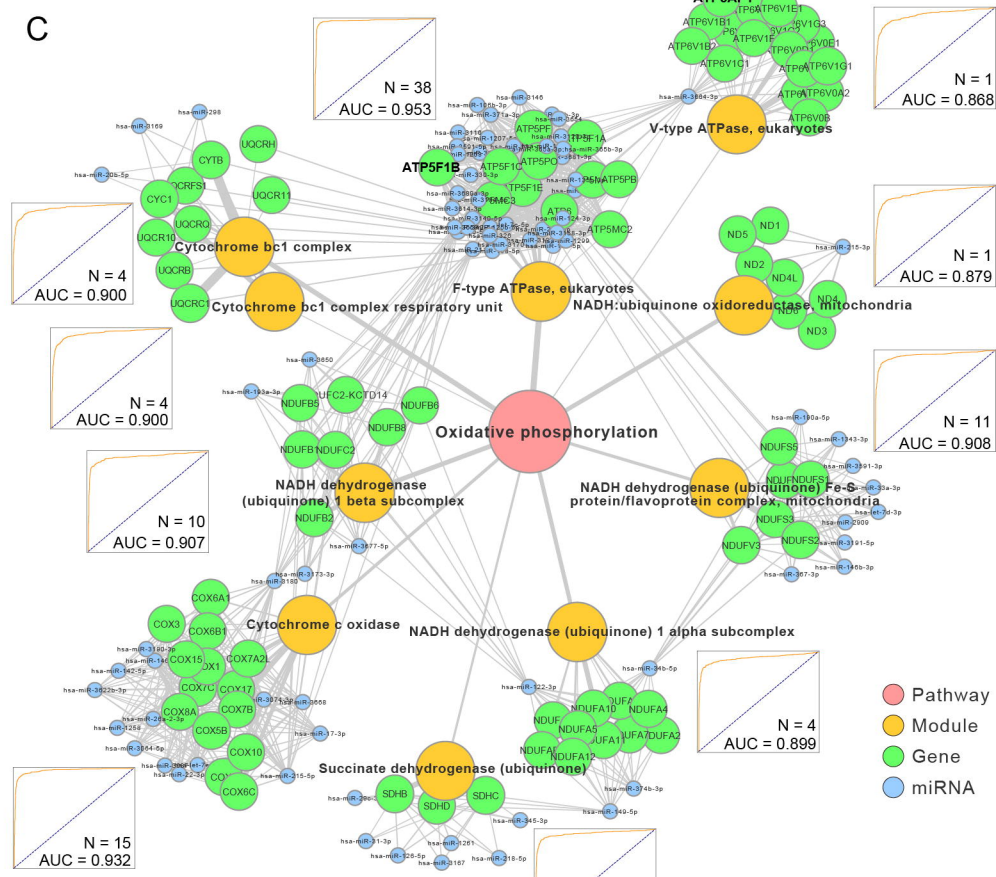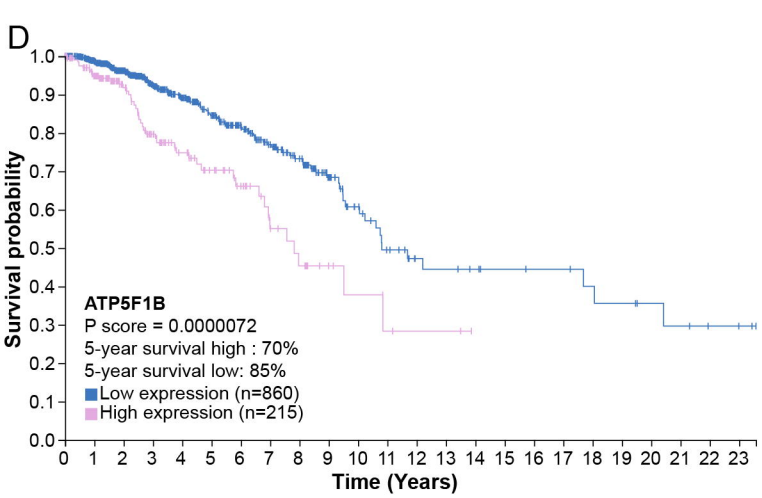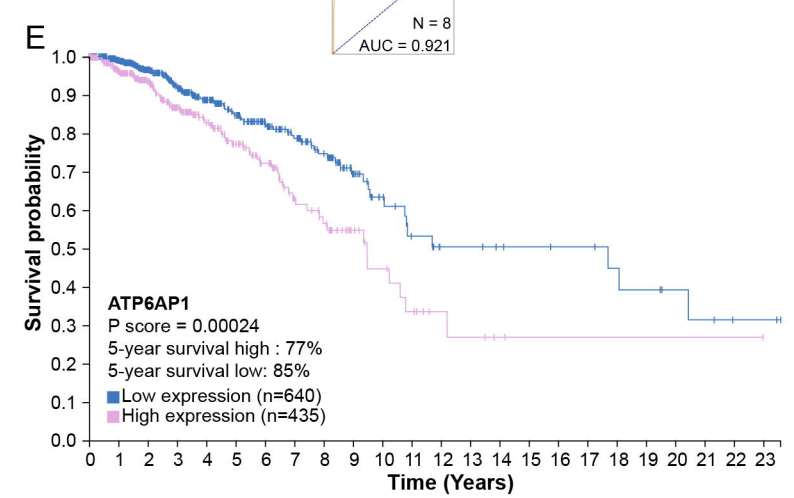

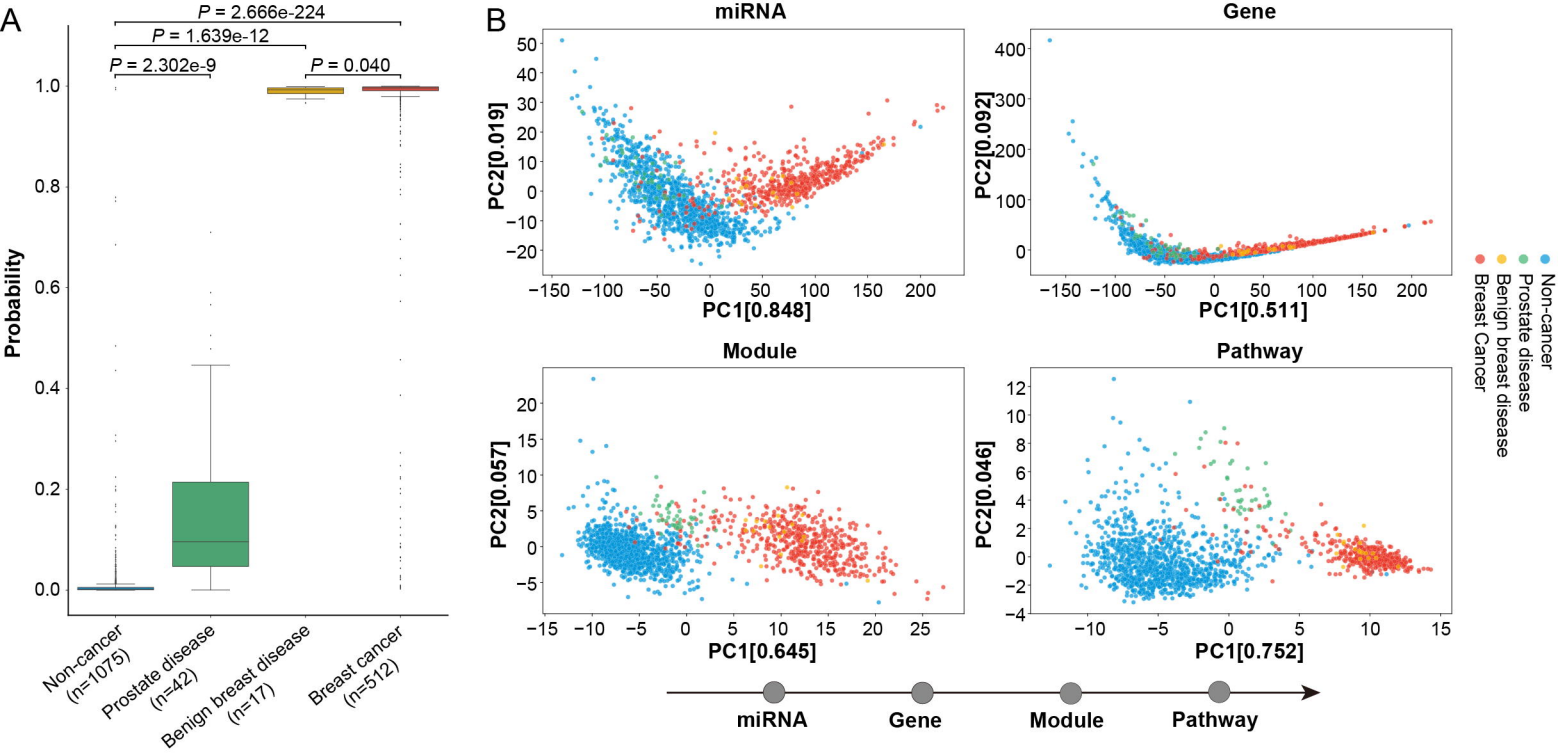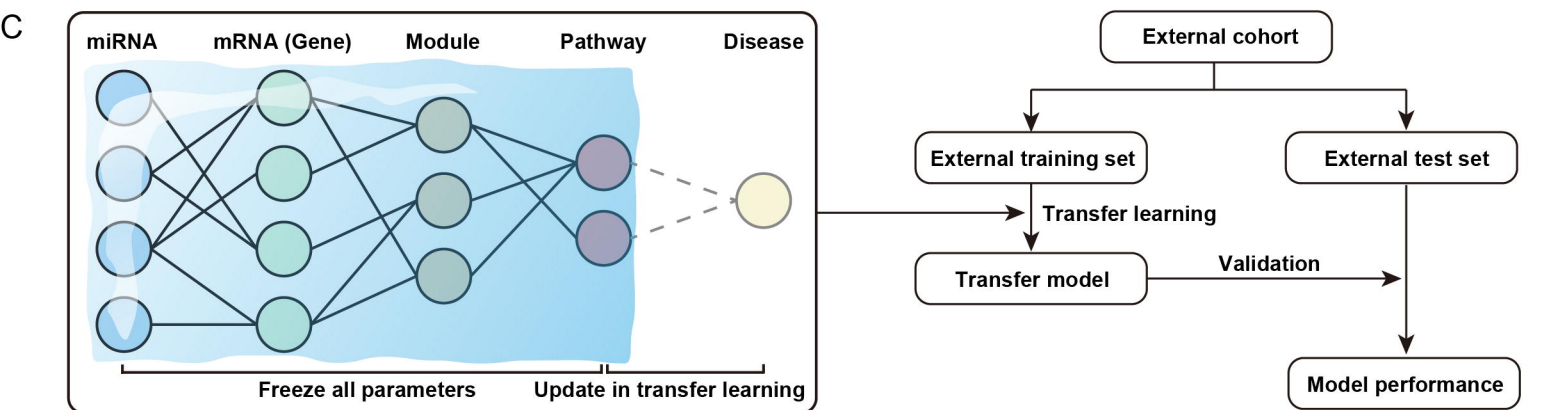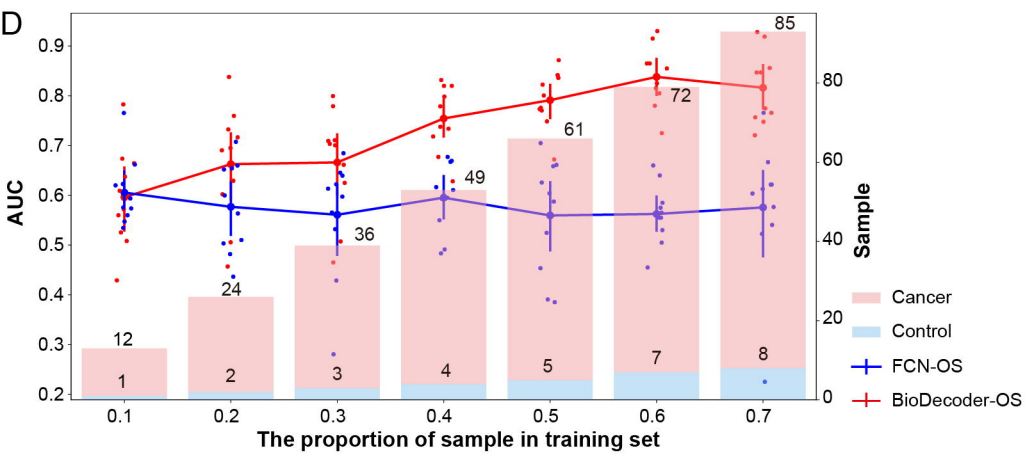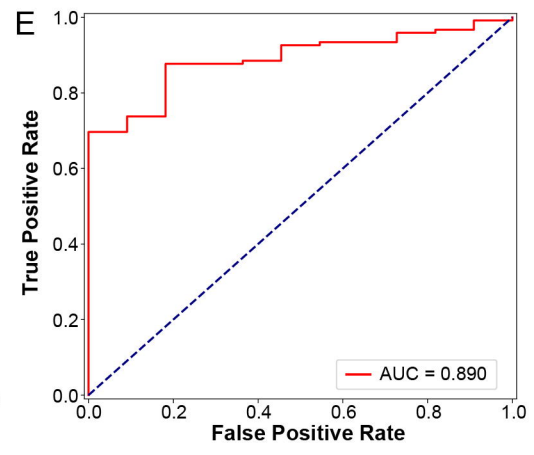

Source: https://medrxiv.org/content/10.1101/2023.01.31.23285308v2.full.pdf
